# Supplementary material for: Role of Norepinephrine in IL-1β-Induced Chondrocyte Dedifferentiation under Physioxia
Source: MDPI journal article supplement (doi:10.3390/ijms20051212), 2019-03-11
Supplement: s1 [file s1]

Supplementary Material - ijms-416948

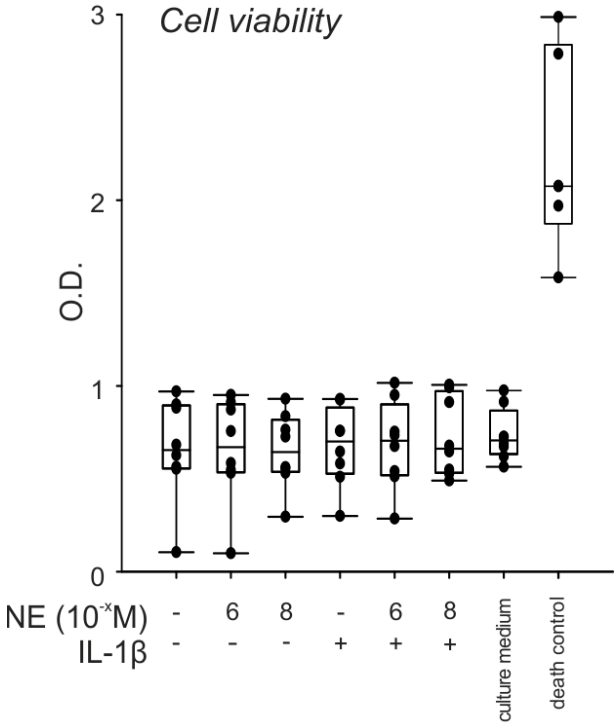

**Figure S1.** Effect of NE and IL-1β on chondrocyte viability. Lactate dehydrogenase (LDH) release in OA chondrocyte cultures at day 7 after treatment with NE, IL-1β, or NE + IL-1β. Each black circle represents cells from an individual patient (n=8). (O.D. – optical density)

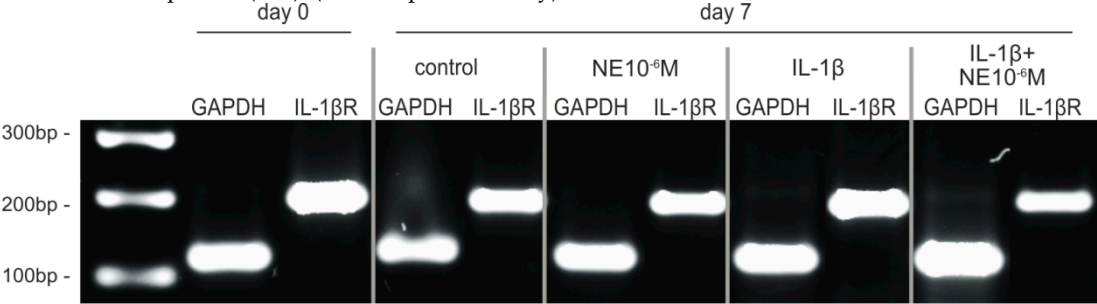

**Figure S2.** IL-1βR expression in OA chondrocytes. Expression of IL-1βR in untreated primary chondrocytes at day 0 and in NE- or/and IL-1β-treated at day 7 (representative images of cells isolated from one OA patient).
